# Supplementary material
Source: PubMed Central journal article supplement (PMC3318803)
Supplement: supp_78.8.2790_AEM5929-11_TablesS1-S2.pdf [file supp_78.8.2790_AEM5929-11_TablesS1-S2.pdf]

## Supplementary tables

Table S1. All predicted EcoRI digestion fragments from VHS1.

| All predicted digestion fragments |             |             |             |                   |             |             |             |
|-----------------------------------|-------------|-------------|-------------|-------------------|-------------|-------------|-------------|
| Arranged by length                |             |             |             | Arranged by order |             |             |             |
| #                                 | Ends        | Coordinates | Length (bp) | #                 | Ends        | Coordinates | Length (bp) |
| 1                                 | EcoRI-EcoRI | 34915-56191 | 21277       | 1                 | EcoRI-EcoRI | 2518-4012   | 1495        |
| 2                                 | EcoRI-EcoRI | 17918-27430 | 9513        | 2                 | EcoRI-EcoRI | 4013-6526   | 2514        |
| 3                                 | EcoRI-EcoRI | 75916-2517  | 8110        | 3                 | EcoRI-EcoRI | 6527-7206   | 680         |
| 4                                 | EcoRI-EcoRI | 27431-34914 | 7484        | 4                 | EcoRI-EcoRI | 7207-9067   | 1861        |
| 5                                 | EcoRI-EcoRI | 65354-70742 | 5389        | 5                 | EcoRI-EcoRI | 9068-9101   | 34          |
| 6                                 | EcoRI-EcoRI | 71916-75915 | 4000        | 6                 | EcoRI-EcoRI | 9102-11876  | 2775        |
| 7                                 | EcoRI-EcoRI | 56192-59864 | 3673        | 7                 | EcoRI-EcoRI | 11877-14349 | 2473        |
| 8                                 | EcoRI-EcoRI | 60278-63870 | 3593        | 8                 | EcoRI-EcoRI | 14350-17234 | 2885        |
| 9                                 | EcoRI-EcoRI | 14350-17234 | 2885        | 9                 | EcoRI-EcoRI | 17235-17917 | 683         |
| 10                                | EcoRI-EcoRI | 9102-11876  | 2775        | 10                | EcoRI-EcoRI | 17918-27430 | 9513        |
| 11                                | EcoRI-EcoRI | 4013-6526   | 2514        | 11                | EcoRI-EcoRI | 27431-34914 | 7484        |
| 12                                | EcoRI-EcoRI | 11877-14349 | 2473        | 12                | EcoRI-EcoRI | 34915-56191 | 21277       |
| 13                                | EcoRI-EcoRI | 7207-9067   | 1861        | 13                | EcoRI-EcoRI | 56192-59864 | 3673        |
| 14                                | EcoRI-EcoRI | 2518-4012   | 1495        | 14                | EcoRI-EcoRI | 59865-60277 | 413         |
| 15                                | EcoRI-EcoRI | 63871-65353 | 1483        | 15                | EcoRI-EcoRI | 60278-63870 | 3593        |
| 16                                | EcoRI-EcoRI | 70743-71582 | 840         | 16                | EcoRI-EcoRI | 63871-65353 | 1483        |
| 17                                | EcoRI-EcoRI | 17235-17917 | 683         | 17                | EcoRI-EcoRI | 65354-70742 | 5389        |
| 18                                | EcoRI-EcoRI | 6527-7206   | 680         | 18                | EcoRI-EcoRI | 70743-71582 | 840         |
| 19                                | EcoRI-EcoRI | 59865-60277 | 413         | 19                | EcoRI-EcoRI | 71583-71915 | 333         |
| 20                                | EcoRI-EcoRI | 71583-71915 | 333         | 20                | EcoRI-EcoRI | 71916-75915 | 4000        |
| 21                                | EcoRI-EcoRI | 9068-9101   | 34          | 21                | EcoRI-EcoRI | 75916-2517  | 8110        |

**Table S2.** All of the putative ORF from VHS1. Gray boxes indicate structural proteins.

| ORF # | start | end   | # Predictors | # Residues | pI     | MW      | Domains                                        | Homologues and thier functions                                                                                                                                                                                                       |
|-------|-------|-------|--------------|------------|--------|---------|------------------------------------------------|--------------------------------------------------------------------------------------------------------------------------------------------------------------------------------------------------------------------------------------|
| 001   | 408   | 851   | 4            | 147        | 4.301  | 16695.7 |                                                |                                                                                                                                                                                                                                      |
| 002   | 848   | 1024  | 3            | 58         | 5.036  | 6547.5  |                                                |                                                                                                                                                                                                                                      |
| 003   | 1026  | 1430  | 4            | 134        | 6.860  | 15212.9 |                                                |                                                                                                                                                                                                                                      |
| 004   | 1427  | 2152  | 5            | 241        | 10.694 | 27073.3 |                                                |                                                                                                                                                                                                                                      |
| 005   | 2139  | 2954  | 5            | 271        | 10.291 | 30501.8 |                                                |                                                                                                                                                                                                                                      |
| 006   | 2957  | 3268  | 5            | 103        | 8.736  | 11773.4 | Pfam-B\1761                                    | Similar to proteins of unknown function in <i>Vibrio</i> phage KVP40, <i>Vibrio</i> sp. 0908, <i>Vibrio harveyi</i> HY01, <i>Ralstonia solanacearum</i> GMI1000                                                                      |
| 007   | 3397  | 3903  | 3            | 168        | 6.006  | 18558.7 |                                                |                                                                                                                                                                                                                                      |
| 008   | 3964  | 4563  | 4            | 199        | 5.341  | 22780.5 | Protein of unknown function (DUF550) (PF04447) | Similar to proteins of unknown function in <i>Mycobacterium</i> phage Kostya, <i>Pseudomonas aeruginosa</i> PA7, <i>Bordetella petrii</i> DSM 12804, <i>Burkholderia thailandensis</i> MSMB43 and <i>Dechloromonas aromatica</i> RCB |
| 009   | 4825  | 5019  | 4            | 64         | 4.951  | 7312.4  |                                                |                                                                                                                                                                                                                                      |
| 010   | 5034  | 5378  | 4            | 114        | 5.651  | 12890.7 |                                                |                                                                                                                                                                                                                                      |
| 011   | 5451  | 5693  | 2            | 80         | 9.120  | 9254.8  |                                                |                                                                                                                                                                                                                                      |
| 012   | 5699  | 6097  | 5            | 132        | 6.944  | 15548.5 |                                                |                                                                                                                                                                                                                                      |
| 013   | 6178  | 6558  | 4            | 126        | 5.773  | 13846.7 |                                                |                                                                                                                                                                                                                                      |
| 014   | 6609  | 6962  | 5            | 117        | 8.064  | 13242.0 |                                                |                                                                                                                                                                                                                                      |
| 015   | 7095  | 7463  | 4            | 122        | 5.233  | 13642.4 |                                                |                                                                                                                                                                                                                                      |
| 016   | 7469  | 7969  | 4            | 166        | 10.000 | 18688.2 |                                                |                                                                                                                                                                                                                                      |
| 017   | 7956  | 8372  | 4            | 138        | 5.558  | 15816.9 |                                                |                                                                                                                                                                                                                                      |
| 018   | 8512  | 8763  | 4            | 83         | 10.831 | 9719.4  |                                                |                                                                                                                                                                                                                                      |
| 019   | 8813  | 9199  | 4            | 128        | 6.523  | 14092.8 |                                                |                                                                                                                                                                                                                                      |
| 020   | 9196  | 9561  | 4            | 121        | 10.079 | 13610.7 |                                                |                                                                                                                                                                                                                                      |
| 021   | 9849  | 10181 | 5            | 110        | 7.188  | 12231.1 |                                                |                                                                                                                                                                                                                                      |
| 022   | 10239 | 10574 | 4            | 111        | 9.576  | 12274.8 |                                                |                                                                                                                                                                                                                                      |
| 023   | 10628 | 11062 | 4            | 144        | 6.252  | 15799.7 |                                                |                                                                                                                                                                                                                                      |
| 024   | 11052 | 11414 | 5            | 120        | 7.508  | 13163.0 |                                                |                                                                                                                                                                                                                                      |
| 025   | 11547 | 11747 | 4            | 66         | 3.917  | 7608.7  |                                                |                                                                                                                                                                                                                                      |
| 026   | 11789 | 12094 | 5            | 101        | 4.916  | 11460.9 |                                                |                                                                                                                                                                                                                                      |
| 027   | 12098 | 12334 | 3            | 78         | 9.719  | 8965.0  |                                                |                                                                                                                                                                                                                                      |
| 028   | 12347 | 12544 | 4            | 65         | 5.097  | 7655.7  |                                                |                                                                                                                                                                                                                                      |
| 029   | 12547 | 12690 | 2            | 47         | 10.954 | 5409.4  |                                                |                                                                                                                                                                                                                                      |
| 030   | 12813 | 13013 | 5            | 66         | 4.879  | 7169.3  |                                                |                                                                                                                                                                                                                                      |
| 031   | 13600 | 15126 | 5            | 508        | 9.100  | 55745.5 |                                                |                                                                                                                                                                                                                                      |
| 032   | 15233 | 16135 | 5            | 300        | 4.256  | 31257.4 |                                                |                                                                                                                                                                                                                                      |
| 033   | 16202 | 17161 | 5            | 319        | 4.237  | 34397.8 |                                                |                                                                                                                                                                                                                                      |
| 034   | 17289 | 17603 | 4            | 104        | 10.058 | 11820.5 |                                                |                                                                                                                                                                                                                                      |
| 035   | 17608 | 18165 | 4            | 185        | 10.188 | 21600.8 |                                                |                                                                                                                                                                                                                                      |
| 036   | 18240 | 18602 | 5            | 120        | 8.208  | 13829.9 |                                                |                                                                                                                                                                                                                                      |
| 037   | 18652 | 18900 | 2            | 82         | 8.218  | 8824.4  |                                                |                                                                                                                                                                                                                                      |
| 038   | 18902 | 19288 | 4            | 128        | 11.436 | 14113.2 |                                                |                                                                                                                                                                                                                                      |
| 039   | 19285 | 19710 | 4            | 141        | 10.211 | 16111.1 |                                                |                                                                                                                                                                                                                                      |
| 040   | 19781 | 20119 | 4            | 112        | 6.796  | 12336.9 |                                                |                                                                                                                                                                                                                                      |
| 041   | 20132 | 20608 | 4            | 158        | 7.959  | 17891.4 |                                                |                                                                                                                                                                                                                                      |
| 042   | 20633 | 21319 | 5            | 228        | 8.826  | 25167.6 |                                                |                                                                                                                                                                                                                                      |
| 043   | 21329 | 21595 | 4            | 88         | 9.867  | 9524.9  |                                                |                                                                                                                                                                                                                                      |
| 044   | 21729 | 22019 | 4            | 96         | 7.735  | 10605.1 |                                                |                                                                                                                                                                                                                                      |
| 045   | 22029 | 22214 | 3            | 61         | 10.692 | 7202.4  |                                                |                                                                                                                                                                                                                                      |
| 046   | 22344 | 22868 | 4            | 174        | 4.662  | 19673.2 |                                                |                                                                                                                                                                                                                                      |
| 047   | 22868 | 23140 | 1            | 90         | 9.466  | 10591.9 |                                                |                                                                                                                                                                                                                                      |
| 048   | 23211 | 23999 | 6            | 262        | 9.686  | 29722.9 | Pfam-B\4580                                    | conserved protein of unknown function                                                                                                                                                                                                |
| 049   | 24037 | 25686 | 5            | 549        | 6.633  | 61247.9 |                                                |                                                                                                                                                                                                                                      |
| 050   | 25758 | 26108 | 4            | 116        | 4.049  | 12396.7 |                                                |                                                                                                                                                                                                                                      |

|       |       |       |               |             |        |          |                                                    |                                                                                                                  |
|-------|-------|-------|---------------|-------------|--------|----------|----------------------------------------------------|------------------------------------------------------------------------------------------------------------------|
| 051   | 26237 | 26848 | 5             | 203         | 4.212  | 23234.7  |                                                    | Conserved protein of unknown function/N6 adenine-specific DNA methyltransferase [Haliangium ochraceum DSM 14365] |
| ORF # | start | end   | # Predic-tors | # Resi-dues | pI     | MW       | Domains                                            | Homologues and thier functions                                                                                   |
| 052   | 26851 | 28032 | 5             | 393         | 3.959  | 41987.1  |                                                    |                                                                                                                  |
| 053   | 28119 | 29072 | 6             | 317         | 9.818  | 35312.9  | Phage capsid (PF05065)                             | Simialar to PBSX protein/capsid protein                                                                          |
| 054   | 29144 | 29431 | 4             | 95          | 4.340  | 10786.9  |                                                    |                                                                                                                  |
| 055   | 29443 | 30081 | 4             | 212         | 5.246  | 22957.8  |                                                    |                                                                                                                  |
| 056   | 30078 | 30542 | 4             | 154         | 9.483  | 17389.5  |                                                    | Y Similar to G protein in Mannheimia haemolytica serotype A2 str. BOVINE                                         |
| 057   | 30539 | 31030 | 4             | 163         | 6.522  | 18316.6  |                                                    |                                                                                                                  |
| 058   | 31084 | 31878 | 6             | 264         | 4.358  | 28601.6  | Pfam-B\ 3954                                       | conserved protein of unknown function                                                                            |
| 059   | 31968 | 32390 | 4             | 140         | 4.960  | 14773.0  |                                                    |                                                                                                                  |
| 060   | 32468 | 32590 | 1             | 40          | 10.680 | 4665.4   |                                                    |                                                                                                                  |
| 061   | 32598 | 36737 | 6             | 1379        | 4.599  | 149916.6 | PhageMin\ Tail (PF10145); Pfam-B\_99; Pfam-B\ 5395 | Similar to phage tail tape measure protein, TP901 family                                                         |
| 062   | 36776 | 37120 | 5             | 114         | 10.106 | 12499.3  |                                                    |                                                                                                                  |
| 063   | 37131 | 38120 | 5             | 329         | 5.738  | 35053.8  |                                                    | Similar to proteins of unknown function in Magnetococcus sp. MC-1                                                |
| 064   | 38132 | 39016 | 5             | 294         | 4.769  | 32677.4  |                                                    | Similar to proteins of unknown function in Magnetococcus sp. MC-1                                                |
| 065   | 39028 | 40326 | 5             | 432         | 5.078  | 47760.7  | Pfam-B\ 4576                                       |                                                                                                                  |
| 066   | 40329 | 40853 | 4             | 174         | 4.358  | 18721.9  |                                                    | Similar to proteins of unknown functions in Denitrovibrio acetiphilus DSM 12809 and Magnetococcus sp. MC-1       |
| 067   | 40854 | 41156 | 4             | 100         | 4.428  | 11111.3  |                                                    |                                                                                                                  |
| 068   | 41153 | 41380 | 3             | 75          | 4.879  | 7823.9   |                                                    |                                                                                                                  |
| 069   | 41397 | 41804 | 4             | 135         | 7.572  | 14888.9  |                                                    | Conserved protein of unknown function                                                                            |
| 070   | 41807 | 42346 | 4             | 179         | 5.028  | 19958.9  |                                                    | Similar to protein of unknown function in Desulfotalea psychrophila LSv54 and Hahella chejuensis KCTC 2396       |
| 071   | 42470 | 43609 | 6             | 379         | 5.192  | 42444.4  | AAA (PF00004)                                      | AAA ATPase central domain protein, putative                                                                      |
| 072   | 44184 | 45674 | 5             | 496         | 9.297  | 54827.4  |                                                    |                                                                                                                  |
| 073   | 45674 | 46330 | 3             | 218         | 9.742  | 24987.0  |                                                    |                                                                                                                  |
| 074   | 46251 | 47696 | 5             | 481         | 4.650  | 54148.9  | DnaB\_C (PF03796)                                  | Similar to replicative DNA helicase/DnaB helicase                                                                |
| 075   | 47769 | 48233 | 5             | 154         | 10.999 | 16855.4  |                                                    |                                                                                                                  |
| 076   | 48238 | 48351 | 2             | 37          | 10.402 | 4307.0   |                                                    |                                                                                                                  |
| 077   | 48359 | 49330 | 5             | 323         | 6.376  | 36959.4  |                                                    | putative DNA primase                                                                                             |
| 078   | 49341 | 50270 | 5             | 309         | 5.765  | 33478.4  |                                                    |                                                                                                                  |
| 079   | 50318 | 51745 | 6             | 475         | 10.000 | 54044.3  | ResIII (PF04851)                                   | putative type III restriction protein res subunit/DEAD-DEAH box helicase/helicase                                |
| 080   | 51841 | 52293 | 5             | 150         | 10.338 | 17409.3  |                                                    |                                                                                                                  |
| 081   | 52301 | 52690 | 4             | 129         | 4.573  | 14461.9  |                                                    |                                                                                                                  |

|       |       |       |                      |                    |        |         |                                                            |                                                                                                                                    |
|-------|-------|-------|----------------------|--------------------|--------|---------|------------------------------------------------------------|------------------------------------------------------------------------------------------------------------------------------------|
| 082   | 52704 | 53780 | 6                    | 358                | 5.554  | 39978.5 | RecA<br>(PF00154)                                          | putative recA<br>protein                                                                                                           |
| 083   | 53761 | 54174 | 4                    | 137                | 10.507 | 15365.7 |                                                            |                                                                                                                                    |
| 084   | 54164 | 55159 | 5                    | 331                | 7.855  | 37525.4 |                                                            |                                                                                                                                    |
| 085   | 55160 | 55720 | 4                    | 186                | 5.846  | 21107.9 |                                                            | conserved protein of<br>unknown function                                                                                           |
| ORF # | start | end   | #<br>Predic-<br>tors | #<br>Resi-<br>dues | pI     | MW      | Domains                                                    | Homologues and<br>thier functions                                                                                                  |
| 086   | 55822 | 56799 | 5                    | 325                | 4.480  | 35854.9 |                                                            | Similar to proteins<br>of unknown in<br>Rhodomicrobium<br>vannielii ATCC 17100<br>and Candidatus<br>Cloacamonas<br>acidaminovorans |
| 087   | 56864 | 57154 | 3                    | 96                 | 10.381 | 11019.7 |                                                            |                                                                                                                                    |
| 088   | 57180 | 57923 | 5                    | 247                | 8.797  | 28462.3 |                                                            |                                                                                                                                    |
| 089   | 58002 | 58733 | 5                    | 243                | 4.560  | 27152.0 |                                                            |                                                                                                                                    |
| 090   | 58744 | 59553 | 5                    | 269                | 6.391  | 30458.6 |                                                            |                                                                                                                                    |
| 091   | 59606 | 61522 | 5                    | 638                | 8.539  | 72539.5 |                                                            | Similar to proteins<br>of unknown function<br>in Rhodococcus phage<br>ReqIDocB7 (Teminase)                                         |
| 092   | 61534 | 61776 | 4                    | 80                 | 8.053  | 8841.2  |                                                            |                                                                                                                                    |
| 093   | 61878 | 62141 | 4                    | 87                 | 4.131  | 9870.0  |                                                            |                                                                                                                                    |
| 094   | 62186 | 62452 | 4                    | 88                 | 10.560 | 9836.4  |                                                            |                                                                                                                                    |
| 095   | 62442 | 62642 | 4                    | 66                 | 10.233 | 7402.5  |                                                            |                                                                                                                                    |
| 096   | 62644 | 62856 | 3                    | 70                 | 6.523  | 7825.0  |                                                            |                                                                                                                                    |
| 097   | 62889 | 64964 | 5                    | 691                | 4.832  | 76634.4 | PPDK\ _N<br>(PF01326);<br>PEP-<br>utilizers<br>(PF00391)   | putative pyruvate<br>phosphate dikinase                                                                                            |
| 098   | 64969 | 65451 | 4                    | 160                | 7.507  | 17263.6 |                                                            |                                                                                                                                    |
| 099   | 65502 | 65999 | 5                    | 165                | 5.796  | 18394.1 |                                                            | putative phosphatase                                                                                                               |
| 100   | 66021 | 67031 | 5                    | 336                | 7.784  | 37815.5 |                                                            |                                                                                                                                    |
| 101   | 67042 | 67584 | 5                    | 180                | 4.385  | 19806.1 |                                                            | Similar to pyruvate<br>decarboxylase and<br>transporter                                                                            |
| 102   | 67634 | 67891 | 4                    | 85                 | 7.349  | 9644.9  |                                                            |                                                                                                                                    |
| 103   | 67903 | 70248 | 6                    | 781                | 6.648  | 89490.9 | 3\_5\_exonu<br>c<br>(PF01612);<br>DNA\_pol\_A<br>(PF00476) | putative DNA<br>polymerase I                                                                                                       |
| 104   | 70250 | 72127 | 5                    | 625                | 4.334  | 68713.5 | Phage\ port<br>al<br>(PF04860)                             | putative capsid<br>portal protein                                                                                                  |
| 105   | 72124 | 72585 | 4                    | 153                | 4.611  | 17192.4 |                                                            |                                                                                                                                    |
| 106   | 72719 | 73210 | 4                    | 163                | 4.580  | 18365.7 |                                                            |                                                                                                                                    |
| 107   | 73216 | 73866 | 6                    | 216                | 7.307  | 25286.5 | MT-A70<br>(PF05063)                                        | putative Adenine-<br>specific<br>methyltransferase/pu<br>tative MT-A70 family<br>protein                                           |
| 108   | 74049 | 74456 | 4                    | 135                | 6.511  | 14904.9 |                                                            |                                                                                                                                    |
| 109   | 74465 | 74920 | 4                    | 151                | 8.201  | 16564.8 |                                                            |                                                                                                                                    |
| 110   | 75045 | 75413 | 3                    | 122                | 7.003  | 14112.1 |                                                            |                                                                                                                                    |
| 111   | 75416 | 75601 | 3                    | 61                 | 11.103 | 7058.0  |                                                            |                                                                                                                                    |
| 112   | 75615 | 76001 | 4                    | 128                | 9.006  | 15118.2 |                                                            |                                                                                                                                    |
| 113   | 76266 | 76499 | 3                    | 77                 | 5.654  | 8195.2  |                                                            |                                                                                                                                    |
| 114   | 76572 | 76754 | 2                    | 60                 | 9.779  | 6798.7  |                                                            |                                                                                                                                    |
| 115   | 76757 | 77041 | 4                    | 94                 | 4.217  | 10653.1 |                                                            |                                                                                                                                    |
| 116   | 77047 | 77346 | 4                    | 99                 | 4.023  | 11081.6 |                                                            |                                                                                                                                    |
| 117   | 77431 | 77739 | 5                    | 102                | 4.468  | 11618.9 |                                                            |                                                                                                                                    |
| 118   | 77791 | 79131 | 5                    | 446                | 4.777  | 49768.8 |                                                            |                                                                                                                                    |
| 119   | 79177 | 79512 | 4                    | 111                | 4.261  | 12598.0 |                                                            |                                                                                                                                    |
| 120   | 79523 | 79903 | 4                    | 126                | 10.527 | 14007.4 | SEC-C<br>(PF02810)                                         |                                                                                                                                    |
| 121   | 79913 | 80371 | 3                    | 152                | 10.016 | 17980.6 |                                                            |                                                                                                                                    |
| 122   | 80379 | 80882 | 4                    | 167                | 3.972  | 18197.1 |                                                            |                                                                                                                                    |
| 123   | 80882 | 81130 | 4                    | 82                 | 10.478 | 9254.4  |                                                            |                                                                                                                                    |
| 124   | 81130 | 81309 | 3                    | 59                 | 10.205 | 6744.7  |                                                            |                                                                                                                                    |
| 125   | 81314 | 81448 | 2                    | 44                 | 3.376  | 4966.8  |                                                            |                                                                                                                                    |
